# Supplementary material for: Enhancing Soil Remediation of Copper-Contaminated Soil through Washing with a Soluble Humic Substance and Chemical Reductant
Source: MDPI journal article supplement (doi:10.3390/agronomy13071754), 2023-06-28
Supplement: s1 [file agronomy-2442591-supplementary.pdf › agronomy-2442591-supplementary.pdf]

## **Supporting Information**

# **Enhancing Soil Remediation of Copper-contaminated Soil through Washing with a Soluble Humic Substance and Chemical Reductant**

**Lina Wang <sup>1</sup>, Jing Wei <sup>1,2\*</sup>, Lu Yang <sup>1</sup>, Yun Chen <sup>1</sup>, Mengjie Wang <sup>1</sup>, Liang Xiao<sup>2</sup>, Guodong Yuan <sup>2</sup>**

**1** State Environmental Protection Key Laboratory of Soil Environmental Management and Pollution Control, Nanjing Institute of Environmental Sciences, Ministry of Ecology and Environment, Nanjing 210042, China<sup>2</sup>

Guangdong Provincial Key Laboratory of Environmental Health and Land Resource, Guangdong Technology and Equipment Research Center for Soil and Water Pollution Control, Zhaoqing University, Zhaoqing 526061, China

\* Correspondence: [jingwei\\_nies@foxmail.com](mailto:jingwei_nies@foxmail.com)

# Supplementary figures

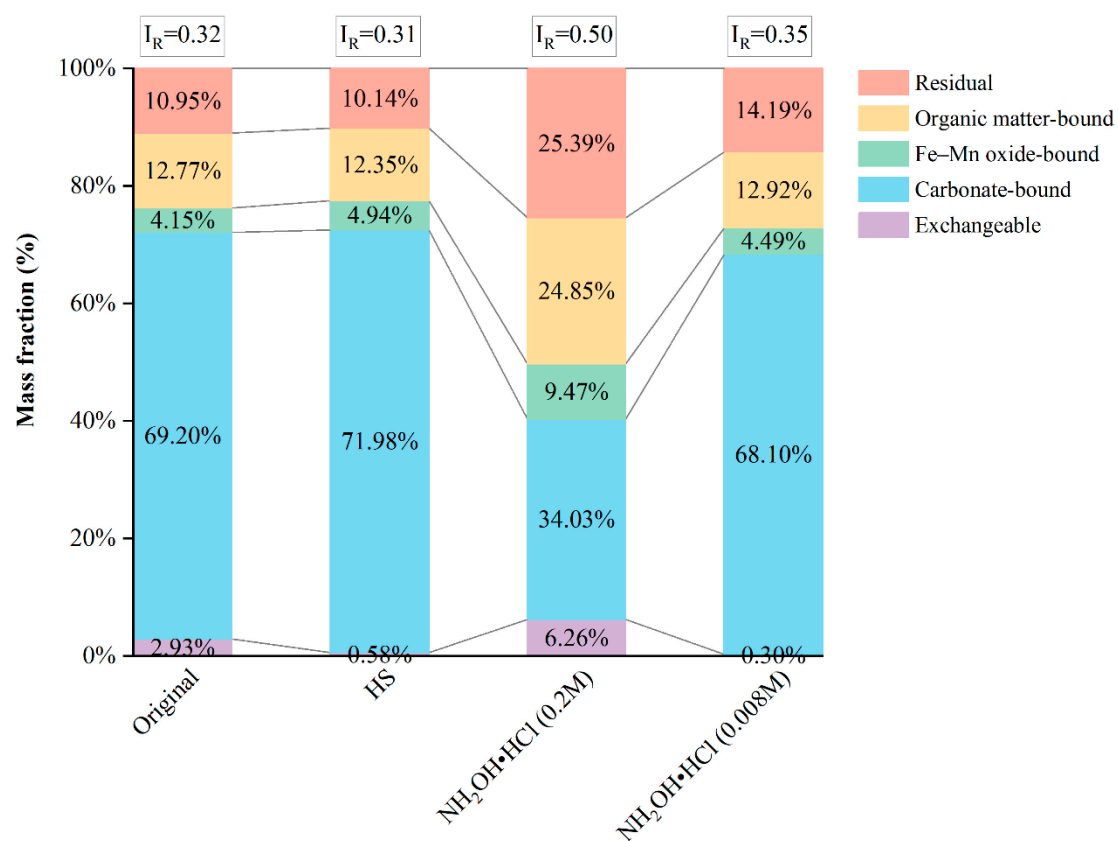

**Figure S1** Changes in Cu fraction in soil after the second round of washing with HS,  $\text{NH}_2\text{OH}\cdot\text{HCl}$

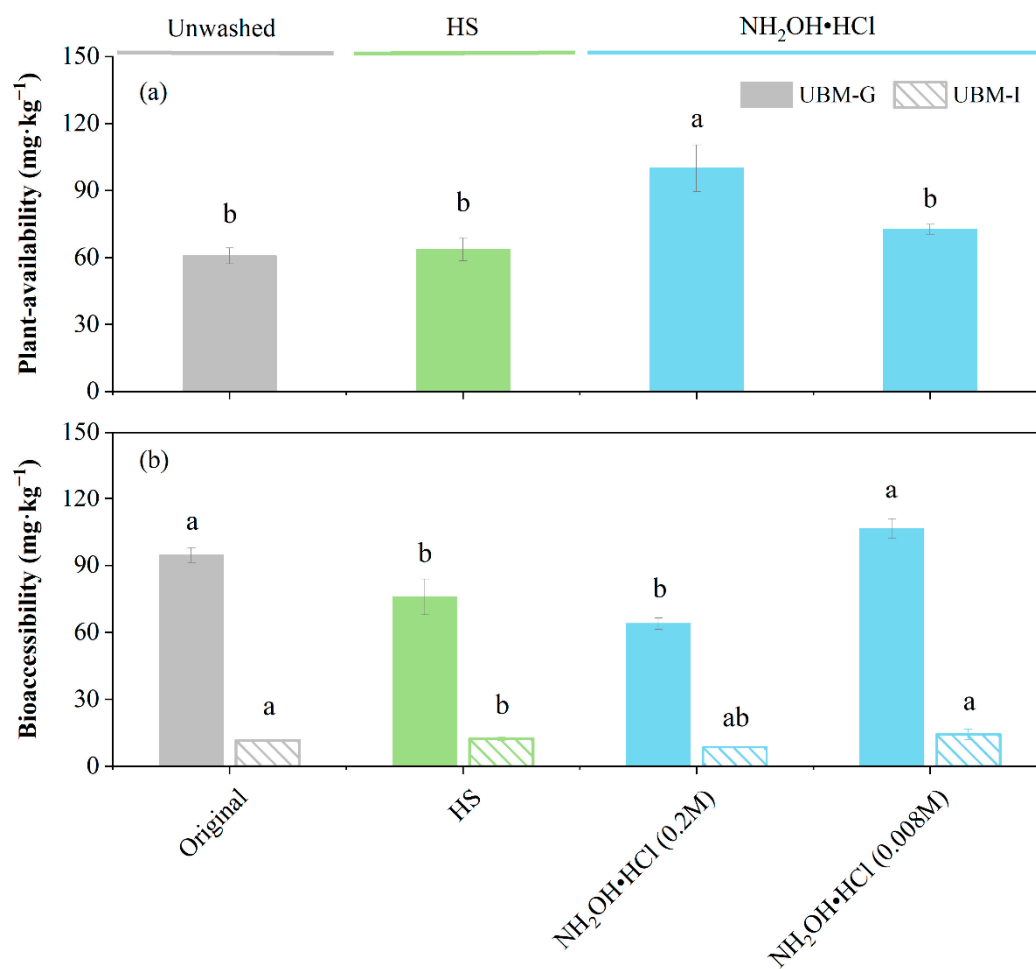

**Figure S2** Plant availability (a) and bio-accessibility (b) of Cu after the second round of washing with HS,  $\text{NH}_2\text{OH} \cdot \text{HCl}$

### *Supplementary table*

**Table S1** Physical and chemical properties of soils before and after the washing with HS,  $\text{NH}_2\text{OH}\cdot\text{HCl}$  and  $\text{NH}_2\text{OH}\cdot\text{HCl} + \text{HS}$

| Properties                                        | Washing times   | pH   | SOM                           | CEC                                 |
|---------------------------------------------------|-----------------|------|-------------------------------|-------------------------------------|
| Unit                                              | -               | -    | $\text{g}\cdot\text{kg}^{-1}$ | $\text{cmol}(+)\cdot\text{kg}^{-1}$ |
| Original                                          | -               | 7.36 | 6.66                          | 10.52                               |
| HS                                                | 1 <sup>st</sup> | 9.08 | 7.95                          | 8.46                                |
|                                                   | 2 <sup>nd</sup> | 8.97 | undetected                    | undetected                          |
| 0.2 M $\text{NH}_2\text{OH}\cdot\text{HCl}$       | 1 <sup>st</sup> | 6.30 | 6.61                          | 9.86                                |
|                                                   | 2 <sup>nd</sup> | 6.71 | undetected                    | undetected                          |
| 0.008 M $\text{NH}_2\text{OH}\cdot\text{HCl}$     | 1 <sup>st</sup> | 6.98 | 6.08                          | 9.53                                |
|                                                   | 2 <sup>nd</sup> | 7.28 | undetected                    | undetected                          |
| $\text{NH}_2\text{OH}\cdot\text{HCl} + \text{HS}$ | 1 <sup>st</sup> | 8.56 | 8.50                          | 8.05                                |
